# Supplementary material for: Caught in a Trap? Proteomic Analysis of Neutrophil Extracellular Traps in Rheumatoid Arthritis and Systemic Lupus Erythematosus
Source: Front Immunol. 2019 Mar 11;10:423. doi: 10.3389/fimmu.2019.00423 (PMC6421309; doi:10.3389/fimmu.2019.00423)
Supplement: Supplementary file 2 [file Table_2.XLSX]

## Sheet: Sheet1
Supplementary Table 2. Full list of proteins identified in healthy control neutrophil NETs stimulated with PMA and A23187 (peptides ≥1) (n=272).
ID	Description	Accession	Peptide count	Unique peptides	Anova (p)	q Value	Max fold change	Highest mean
ACLY	ATP-citrate synthase	P53396	1	1	0.773245	0.423033	1.03822	A23187
ACTR2	Actin-related protein 2	P61160	8	8	0.260404	0.183994	1.35309	A23187
ADSS	Adenylosuccinate synthetase isozyme 2	P30520; Q8N142	4	4	0.839117	0.4477	1.02768	A23187
AHCY	Adenosylhomocysteinase	P23526	1	1	0.824742	0.442772	1.94932	A23187
AKR1A1	Alcohol dehydrogenase [NADP(+)]	P14550	1	1	0.00717182	0.0138689	6.64068	A23187
ALDOA	Fructose-bisphosphate aldolase A	P04075; P05062	17	14	0.00312839	0.00913769	2.14291	A23187
ALDOC	Fructose-bisphosphate aldolase C	P09972	3	1	0.0140532	0.0214321	3.23943	A23187
ANP32A	Acidic leucine-rich nuclear phosphoprotein 32 family member A	P39687	1	1	0.00176332	0.00678625	6.65318	A23187
ANXA3	Annexin A3	P12429	17	17	0.626232	0.367075	1.14033	A23187
ARHGDIA	Rho GDP-dissociation inhibitor 1	P52565	1	1	0.00897623	0.0154689	2.99425	A23187
ARHGDIB	Rho GDP-dissociation inhibitor 2	P52566	9	9	0.0109424	0.0177899	3.61528	A23187
ARPC1B	Actin-related protein 2/3 complex subunit 1B	O15143; Q92747	7	7	0.164567	0.130093	1.35809	A23187
ARPC2	Actin-related protein 2/3 complex subunit 2	O15144	9	9	0.036406	0.0407398	1.43789	A23187
ARPC3	Actin-related protein 2/3 complex subunit 3	O15145	5	5	0.0620552	0.0604187	1.68282	A23187
ARPC4	Actin-related protein 2/3 complex subunit 4	P59998	5	5	0.0119462	0.0188874	1.52174	A23187
ARPC5	Actin-related protein 2/3 complex subunit 5	O15511	2	2	0.031721	0.0369362	2.08614	A23187
ASAH1	Acid ceramidase	Q13510	1	1	0.000751286	0.00512519	8.04539	A23187
B2M	Beta-2-microglobulin	P61769	3	3	0.340156	0.22374	1.83791	A23187
BASP1	Brain acid soluble protein 1	P80723	4	4	0.0470903	0.0494647	5.25694	A23187
BPI	Bactericidal permeability-increasing protein	P17213	9	9	0.0426041	0.0467064	2.97583	A23187
CALM1	Calmodulin	P62158	4	4	0.000613779	0.00503686	3.00529	A23187
CALR	Calreticulin	P27797	2	2	0.258252	0.183906	1.79104	A23187
CAMP	Cathelicidin antimicrobial peptide	P49913	7	7	0.0219867	0.0282763	4.55781	A23187
CAP1	Adenylyl cyclase-associated protein 1	Q01518; P40123	21	21	0.00171485	0.00678625	4.2932	A23187
CAPG	Macrophage-capping protein	P40121	6	6	0.00142827	0.00665236	3.02247	A23187
CAPZA1	F-actin-capping protein subunit alpha-1	P52907	6	5	0.260511	0.183994	1.57367	A23187
CAPZA2	F-actin-capping protein subunit alpha-2	P47755	2	1	0.106181	0.0928855	1.32549	A23187
CAPZB	F-actin-capping protein subunit beta	P47756	7	7	0.278497	0.191212	1.15916	A23187
CAT	Catalase	P04040	4	4	0.0244384	0.0298689	5.17427	A23187
CD44	CD44 antigen	P16070	1	1	0.855084	0.452021	3.2941	A23187
CDA	Cytidine deaminase	P32320	1	1	0.942196	0.484243	1.12217	A23187
CEACAM8	Carcinoembryonic antigen-related cell adhesion molecule 8	P31997; P06731	4	3	0.944138	0.484243	1.52961	A23187
CFL1	Cofilin-1	P23528; Q9Y281	7	7	0.0882734	0.0792311	1.93053	A23187
CHI3L1	Chitinase-3-like protein 1	P36222	1	1	0.0205916	0.0269016	14.3431	A23187
CLC	Galectin-10	Q05315	5	5	0.0403262	0.0445482	8.4309	A23187
CLIC1	Chloride intracellular channel protein 1	O00299	4	4	0.000469579	0.00503686	3.77539	A23187
CNN2	Calponin-2	Q99439	2	2	0.233449	0.170469	1.8415	A23187
COL1A1	Collagen alpha-1(I) chain	P02452	1	1	0.586011	0.348237	412.594	A23187
CORO1A	Coronin-1A	P31146; Q7L014	18	18	0.0148773	0.0222942	2.64191	A23187
COTL1	Coactosin-like protein	Q14019	6	6	0.0476471	0.0494647	2.9785	A23187
CPPED1	Serine/threonine-protein phosphatase CPPED1	Q9BRF8	1	1	0.00756492	0.0138689	4.11406	A23187
CRISP3	Cysteine-rich secretory protein 3	P54108	3	3	0.00265087	0.0086175	19.3452	A23187
CSTA	Cystatin-A	P01040	3	3	0.00181142	0.00678625	13.9141	A23187
DCD	Dermcidin	P81605	2	2	0.272584	0.190183	20.1029	A23187
EEF1A1P5	Putative elongation factor 1-alpha-like 3	Q5VTE0	3	3	0.00361885	0.00974445	8.78062	A23187
EFHD2	EF-hand domain-containing protein D2	Q96C19	1	1	0.36129	0.233426	2.0766	A23187
EIF4A2	Eukaryotic initiation factor 4A-II	Q14240	1	1	0.00396762	0.0102052	2.90115	A23187
ENO1	Alpha-enolase	P06733; P13929	22	17	0.000841387	0.00512519	6.08087	A23187
EPX	Eosinophil peroxidase	P11678	6	1	0.16285	0.129687	1.97912	A23187
ERCC2	TFIIH basal transcription factor complex helicase XPD subunit	P18074	1	1	0.00319315	0.00917139	2.94461	A23187
FAM49B	Protein FAM49B	Q9NUQ9; Q9H0Q0	2	2	0.000163647	0.00352521	3.22086	A23187
FCGR3A	Low affinity immunoglobulin gamma Fc region receptor III-A	P08637	1	1	0.28595	0.194009	7.1914	A23187
FKBP1A	Peptidyl-prolyl cis-trans isomerase FKBP1A	P62942	3	3	0.000782896	0.00512519	6.7339	A23187
FLNA	Filamin-A	P21333; Q14315; O75369	54	53	0.0514274	0.0522435	1.91606	A23187
FLOT2	Flotillin-2	Q14254	1	1	0.0237097	0.0294551	3.07164	A23187
FOLR3	Folate receptor gamma	P41439	1	1	0.23305	0.170469	50.3631	A23187
G6PD	Glucose-6-phosphate 1-dehydrogenase	P11413	11	11	0.016799	0.024534	1.95204	A23187
GAPDH	Glyceraldehyde-3-phosphate dehydrogenase	P04406; O14556	17	17	0.00270844	0.0086175	4.25251	A23187
GMFG	Glia maturation factor gamma	O60234	1	1	0.0216152	0.0280075	3.42135	A23187
GNAI2	Guanine nucleotide-binding protein G(i) subunit alpha-2	P04899; P08754; A8MTJ3	4	4	0.87179	0.458042	1.00983	A23187
GPI	Glucose-6-phosphate isomerase	P06744; Q8N196	8	8	0.00542459	0.0118333	2.86592	A23187
GRB2	Growth factor receptor-bound protein 2	P62993	1	1	0.000862464	0.00512519	7.60564	A23187
GRN	Granulins	P28799	2	2	0.73765	0.406138	1.04087	A23187
GSTO1	Glutathione S-transferase omega-1	P78417	2	2	0.00311157	0.00913769	5.91167	A23187
GSTP1	Glutathione S-transferase P	P09211	12	12	0.151091	0.123402	1.73134	A23187
H1F0	Histone H1.0	P07305	2	2	0.000579477	0.00503686	26.6999	A23187
H2AFY	Core histone macro-H2A.1	O75367; Q9P0M6	8	8	0.989308	0.49561	1.00019	A23187
H2AFZ	Histone H2A.Z	P0C0S5	3	1	0.245321	0.177293	2.05482	A23187
HIST1H1B	Histone H1.5	P16401	3	3	0.00113885	0.00560746	21.8731	A23187
HIST1H1E	Histone H1.4	P10412; P22492	4	3	0.00107922	0.00547012	13.7028	A23187
HIST1H2AG	Histone H2A type 1	P0C0S8; P16104	4	1	0.953092	0.485898	1.00574	A23187
HIST1H2BJ	Histone H2B type 1-J	P06899; Q8N257; Q6DN03	9	2	0.686666	0.394122	1.38318	A23187
HIST2H2BF	Histone H2B type 2-F	Q5QNW6; Q96A08	9	2	0.837455	0.4477	1.02148	A23187
HK3	Hexokinase-3	P52790; P52789	13	13	0.154528	0.125024	1.40101	A23187
HMGB1P1	Putative high mobility group protein B1-like 1	B2RPK0; P23497	2	2	0.00162905	0.00678625	5.67074	A23187
HMGB2	High mobility group protein B2	P26583	4	4	0.000138919	0.00352521	12.9661	A23187
HNRNPD	Heterogeneous nuclear ribonucleoprotein D0	Q14103	1	1	0.00357827	0.00974445	12.712	A23187
HNRNPK	Heterogeneous nuclear ribonucleoprotein K	P61978	1	1	0.0469307	0.0494647	2.31781	A23187
HSP90AA1	Heat shock protein HSP 90-alpha	P07900; Q12931; Q14568; Q58FF6; Q58FG0; Q9NQH7	8	3	0.641484	0.373475	1.10137	A23187
HSP90AB1	Heat shock protein HSP 90-beta	P08238	6	2	0.562464	0.335401	1.12134	A23187
HSPA1A	Heat shock 70 kDa protein 1A	P0DMV8; P17066 ;P48741	21	11	0.0117064	0.0186795	2.47808	A23187
HSPA8	Heat shock cognate 71 kDa protein	P11142; P54652	9	5	0.0046966	0.0107917	3.12927	A23187
ICAM3	Intercellular adhesion molecule 3	P32942	2	2	0.0579674	0.0570838	1.93128	A23187
IFITM3	Interferon-induced transmembrane protein 3	Q01628	1	1	0.749772	0.411497	1.14686	A23187
KCTD1	BTB/POZ domain-containing protein KCTD1	Q719H9	1	1	0.0141969	0.0214612	5.5951	A23187
KPNB1	Importin subunit beta-1	Q14974	1	1	0.552747	0.330751	1.47817	A23187
LCN2	Neutrophil gelatinase-associated lipocalin	P80188	9	9	0.000283685	0.00503686	15.8711	A23187
LCP1	Plastin-2	P13796; P13797; Q14651	26	26	0.00407806	0.0102894	2.20371	A23187
LDHA	L-lactate dehydrogenase A chain	P00338; P07864	10	9	0.000998554	0.00547012	3.95703	A23187
LDHB	L-lactate dehydrogenase B chain	P07195	4	3	0.00160177	0.00678625	6.61392	A23187
LTA4H	Leukotriene A-4 hydrolase	P09960	18	18	0.00178167	0.00678625	3.87141	A23187
MDH1	Malate dehydrogenase, cytoplasmic	P40925	1	1	0.00394991	0.0102052	6.27319	A23187
MGAM	Maltase-glucoamylase, intestinal	O43451	1	1	0.645242	0.374398	1.11597	A23187
MIF	Macrophage migration inhibitory factor	P14174	1	1	0.291986	0.195793	1.39357	A23187
MMP8	Neutrophil collagenase	P22894	5	5	0.00141381	0.00665236	11.306	A23187
MMP9	Matrix metalloproteinase-9	P14780	3	3	0.013534	0.0208245	8.55342	A23187
MSN	Moesin	P26038; P35241; P15311	26	26	0.000100975	0.00352521	4.83175	A23187
MTPN	Myotrophin	P58546	1	1	0.00439208	0.0106605	2.80189	A23187
MUCL1	Mucin-like protein 1	Q96DR8	1	1	0.363074	0.233468	6.3491	A23187
MYH9	Myosin-9	P35579; P35749; P35580; Q7Z406; A7E2Y1	80	80	0.0573207	0.0567713	2.19528	A23187
MYL12B	Myosin regulatory light chain 12B	O14950; P24844	7	7	0.276604	0.191212	1.38701	A23187
MYL6	Myosin light polypeptide 6	P60660; P05976; P14649	10	10	0.0222712	0.02843	2.21126	A23187
NAMPT	Nicotinamide phosphoribosyltransferase	P43490	6	6	0.00411978	0.0102894	2.94615	A23187
NCF1B	Putative neutrophil cytosol factor 1B	A6NI72	2	2	0.00943571	0.0157872	4.58813	A23187
NPC2	Epididymal secretory protein E1	P61916	2	2	0.0428219	0.0467064	1.95083	A23187
NUP93	Nuclear pore complex protein Nup93	Q8N1F7	1	1	0.0197671	0.0269016	5.18804	A23187
OLFM4	Olfactomedin-4	Q6UX06	8	8	0.98879	0.49561	1.07742	A23187
OSTF1	Osteoclast-stimulating factor 1	Q92882	1	1	0.371435	0.2362	1.33973	A23187
P4HB	Protein disulfide-isomerase	P07237	4	4	0.0448884	0.0483483	1.76381	A23187
PADI4	Protein-arginine deiminase type-4	Q9UM07; Q2KJY2; Q9ULW8	12	12	0.00566693	0.0120656	7.12686	A23187
PARK7	Protein deglycase DJ-1	Q99497	5	5	0.00100735	0.00547012	5.8672	A23187
PEBP1	Phosphatidylethanolamine-binding protein 1	P30086	3	3	0.0045739	0.0107917	9.11494	A23187
PFN1	Profilin-1	P07737	11	11	0.00710762	0.0138689	2.53542	A23187
PGAM1	Phosphoglycerate mutase 1	P18669; P15259; Q8N0Y7	4	4	0.882564	0.460892	1.19306	A23187
PGD	6-phosphogluconate dehydrogenase, decarboxylating	P52209	10	10	0.00794937	0.0144204	3.11233	A23187
PGK1	Phosphoglycerate kinase 1	P00558; P07205	17	17	0.000543444	0.00503686	5.44428	A23187
PGLS	6-phosphogluconolactonase	O95336	4	4	0.176481	0.138874	1.55813	A23187
PGLYRP1	Peptidoglycan recognition protein 1	O75594	4	4	0.00166187	0.00678625	14.8626	A23187
PGM1	Phosphoglucomutase-1	P36871	3	3	0.00381088	0.0101037	3.62618	A23187
PKM	Pyruvate kinase PKM	P14618; P30613	33	33	0.194837	0.148838	1.47326	A23187
PLBD1	Phospholipase B-like 1	Q6P4A8	5	5	0.0184498	0.0256412	4.63856	A23187
PNP	Purine nucleoside phosphorylase	P00491	3	3	0.0359254	0.0406235	3.75417	A23187
PPIA	Peptidyl-prolyl cis-trans isomerase A	P62937; Q9Y536; A0A075B759	15	15	0.000158891	0.00352521	6.45253	A23187
PRCP	Lysosomal Pro-X carboxypeptidase	P42785	1	1	0.972531	0.490054	12.9865	A23187
PRDX5	Peroxiredoxin-5, mitochondrial	P30044	6	6	0.0298267	0.0349667	2.27703	A23187
PRDX6	Peroxiredoxin-6	P30041	3	3	0.00049838	0.00503686	3.0326	A23187
PREX2	Phosphatidylinositol 3,4,5-trisphosphate-dependent Rac exchanger 2 protein	Q70Z35	1	1	0.547312	0.32864	1.29123	A23187
PRTN3	Myeloblastin	P24158	2	2	0.710091	0.399907	1.48916	A23187
PTPN6	Tyrosine-protein phosphatase non-receptor type 6	P29350	4	4	0.161572	0.129507	1.52653	A23187
PTX3	Pentraxin-related protein PTX3	P26022	1	1	0.0174823	0.0246378	7.10152	A23187
PYGL	Glycogen phosphorylase, liver form	P06737; P11216	8	8	0.00981154	0.0162581	1.46796	A23187
RAB11B	Ras-related protein Rab-11B	Q15907	4	4	0.633069	0.369825	1.06336	A23187
RAC2	Ras-related C3 botulinum toxin substrate 2	P15153; P60763; P17081	7	6	0.361654	0.233426	1.32087	A23187
RAN	GTP-binding nuclear protein Ran	P62826	4	4	0.236362	0.171868	1.6195	A23187
RETN	Resistin	Q9HD89	3	3	0.00309512	0.00913769	9.53139	A23187
RNASE2	Non-secretory ribonuclease	P10153	2	2	0.868817	0.457876	1.17547	A23187
RNH1	Ribonuclease inhibitor	P13489	5	5	0.39597	0.24814	1.21677	A23187
RPS27A	Ubiquitin-40S ribosomal protein S27a	P62979	5	5	0.000501151	0.00503686	3.17246	A23187
S100A11	Protein S100-A11	P31949	6	6	0.0273885	0.0325513	2.76967	A23187
S100A4	Protein S100-A4	P26447	1	1	0.0998174	0.0882142	3.74004	A23187
S100A6	Protein S100-A6	P06703	3	3	0.0150173	0.0223101	2.75054	A23187
S100A8	Protein S100-A8	P05109	10	10	0.12956	0.109988	1.31834	A23187
S100P	Protein S100-P	P25815	2	2	0.00103005	0.00547012	4.5136	A23187
SERPINB1	Leukocyte elastase inhibitor	P30740	11	11	0.000102607	0.00352521	4.60671	A23187
SERPINB10	Serpin B10	P48595	5	5	0.00753909	0.0138689	2.40888	A23187
SFPQ	Splicing factor, proline- and glutamine-rich	P23246	1	1	0.0020934	0.00736245	12.3204	A23187
SH3BGRL	SH3 domain-binding glutamic acid-rich-like protein	O75368	4	4	0.000152605	0.00352521	13.9845	A23187
SH3BGRL3	SH3 domain-binding glutamic acid-rich-like protein 3	Q9H299	2	2	6.05e-05	0.00352521	12.9681	A23187
SHROOM3	Protein Shroom3	Q8TF72	1	1	0.0531062	0.05352	6.56245	A23187
STMN1	Stathmin	P16949	1	1	0.012841	0.0201174	64.5575	A23187
SUB1	Activated RNA polymerase II transcriptional coactivator p15	P53999	1	1	0.00341697	0.00949766	8.88535	A23187
SUMO4	Small ubiquitin-related modifier 4	Q6EEV6	1	1	0.00916682	0.0154876	6.42918	A23187
TALDO1	Transaldolase	P37837	8	8	0.000476332	0.00503686	10.0561	A23187
TF	Serotransferrin	P02787	7	7	0.291769	0.195793	1.56613	A23187
TKT	Transketolase	P29401	24	24	0.00702046	0.0138689	2.33614	A23187
TLN1	Talin-1	Q9Y490; Q9Y4G6	9	9	0.0487406	0.0502969	2.34757	A23187
TPI1	Triosephosphate isomerase	P60174	10	10	0.000355119	0.00503686	9.33981	A23187
TPM3	Tropomyosin alpha-3 chain	P06753	3	3	0.000497481	0.00503686	7.77431	A23187
TUBA4A	Tubulin alpha-4A chain	P68366; P68363	3	3	0.0803017	0.07322	1.49167	A23187
TUBB	Tubulin beta chain	P07437; P68371; Q13885; Q13509; A6NNZ2; P04350; Q9BUF5	7	7	0.00424088	0.0104406	2.57885	A23187
TXN	Thioredoxin	P10599	1	1	0.0103569	0.0169983	3.04522	A23187
UBE2N	Ubiquitin-conjugating enzyme E2 N	P61088; Q5JXB2	2	2	0.544281	0.327963	1.13343	A23187
VASP	Vasodilator-stimulated phosphoprotein	P50552	4	4	0.00661961	0.0132648	15.0218	A23187
VCL	Vinculin	P18206	17	17	0.189284	0.147601	1.5287	A23187
VIM	Vimentin	P08670; P17661; P41219; P07196	24	23	0.00737754	0.0138689	2.03301	A23187
WDR1	WD repeat-containing protein 1	O75083	6	6	0.00518382	0.0114531	3.63564	A23187
YWHAB	14-3-3 protein beta/alpha	P31946	10	4	0.00464466	0.0107917	3.56608	A23187
YWHAE	14-3-3 protein epsilon	P62258	4	1	0.00814084	0.0146139	7.23853	A23187
YWHAH	14-3-3 protein eta	Q04917	7	4	0.0641286	0.0620867	16.0401	A23187
YWHAQ	14-3-3 protein theta	P27348	7	1	0.0203111	0.0269016	3.96086	A23187
YWHAZ	14-3-3 protein zeta/delta	P63104; P31947	12	6	0.0206056	0.0269016	2.75349	A23187
ACSL1	Long-chain-fatty-acid--CoA ligase 1	P33121	1	1	0.00594616	0.0124965	17.2024	PMA
ACTN1	Alpha-actinin-1	P12814; Q08043	25	16	0.0461909	0.049137	1.81996	PMA
ACTN4	Alpha-actinin-4	O43707; P35609	17	8	0.290449	0.195793	1.30786	PMA
ACTR3	Actin-related protein 3	P61158; Q9P1U1; Q9C0K3	11	11	0.708404	0.399907	1.12586	PMA
ALOX5	Arachidonate 5-lipoxygenase	P09917	1	1	0.040312	0.0445482	9.03311	PMA
ALOX5AP	Arachidonate 5-lipoxygenase-activating protein	P20292	3	3	0.000829662	0.00512519	4.15784	PMA
AMPD3	AMP deaminase 3	Q01432	1	1	0.498449	0.304606	1.20705	PMA
ANXA1	Annexin A1	P04083	21	21	0.0475973	0.0494647	2.1811	PMA
ANXA11	Annexin A11	P50995	13	12	0.00751194	0.0138689	2.156	PMA
ANXA4	Annexin A4	P09525	12	12	0.219396	0.16227	1.59981	PMA
ANXA5	Annexin A5	P08758	7	7	0.284428	0.19374	1.5836	PMA
ANXA6	Annexin A6	P08133	33	33	0.0021923	0.00755608	4.84955	PMA
ANXA7	Annexin A7	P20073	4	4	0.00066947	0.00512519	3.40723	PMA
APMAP	Adipocyte plasma membrane-associated protein	Q9HDC9	6	6	0.000845766	0.00512519	8.07214	PMA
ARF3	ADP-ribosylation factor 3	P61204; P18085	3	3	0.0834927	0.0757289	1.68113	PMA
ARL6IP5	PRA1 family protein 3	O75915	1	1	0.0226496	0.028491	7.80814	PMA
ARL8B	ADP-ribosylation factor-like protein 8B	Q9NVJ2	1	1	0.134586	0.11259	1.3273	PMA
ATP2A3	Sarcoplasmic/endoplasmic reticulum calcium ATPase 3	Q93084 ;O14983	2	2	0.0502461	0.0515418	2.42152	PMA
AZU1	Azurocidin	P20160	11	11	0.00195451	0.00701719	5.23872	PMA
BAX	Apoptosis regulator BAX	Q07812	1	1	0.195304	0.148838	3.44025	PMA
BST1	ADP-ribosyl cyclase/cyclic ADP-ribose hydrolase 2	Q10588	2	2	0.910342	0.472534	1.06402	PMA
C5AR1	C5a anaphylatoxin chemotactic receptor 1	P21730	2	2	0.187367	0.14677	2.29644	PMA
CANX	Calnexin	P27824	1	1	0.0759236	0.0708834	1.87895	PMA
CD177	CD177 antigen	Q8N6Q3	4	4	0.929706	0.481136	1.28661	PMA
CD47	Leukocyte surface antigen CD47	Q08722	1	1	0.0357654	0.0406235	2.2999	PMA
CDC42	Cell division control protein 42 homolog	P60953	3	2	0.24588	0.177293	1.40252	PMA
CEACAM1	Carcinoembryonic antigen-related cell adhesion molecule 1	P13688	2	1	0.000373661	0.00503686	6.03679	PMA
CEACAM6	Carcinoembryonic antigen-related cell adhesion molecule 6	P40199	2	2	0.402983	0.25162	1.99388	PMA
CLTC	Clathrin heavy chain 1	Q00610	5	5	0.192863	0.148838	2.24529	PMA
CPNE1	Copine-1	Q99829	1	1	0.365869	0.23439	3.2816	PMA
CPNE3	Copine-3	O75131; O95741	7	7	0.0166432	0.0245141	1.9964	PMA
CTSG	Cathepsin G	P08311	15	15	0.0265753	0.0320265	2.66431	PMA
CXCR2	C-X-C chemokine receptor type 2	P25025	1	1	0.608193	0.357946	1.04971	PMA
CYBA	Cytochrome b-245 light chain	P13498	1	1	0.00825194	0.0146606	6.30113	PMA
CYBB	Cytochrome b-245 heavy chain	P04839	6	6	0.196052	0.148838	1.7526	PMA
CYP4F3	Docosahexaenoic acid omega-hydroxylase CYP4F3	Q08477; P78329; P98187; Q9HCS2	4	4	0.000746008	0.00512519	12.2994	PMA
DDOST	Dolichyl-diphosphooligosaccharide--protein glycosyltransferase 48 kDa subunit	P39656	1	1	0.0928648	0.0829203	10.7651	PMA
DEFA1	Neutrophil defensin 1	P59665	4	4	0.523997	0.318456	1.129	PMA
DHRS7	Dehydrogenase/reductase SDR family member 7	Q9Y394	1	1	0.0083529	0.0146885	5.21724	PMA
DYSF	Dysferlin	O75923	1	1	0.0771604	0.0714502	53.3191	PMA
ELANE	Neutrophil elastase	P08246	13	13	0.0170519	0.0245775	2.42082	PMA
FABP5	Fatty acid-binding protein, epidermal	Q01469	2	2	0.952141	0.485898	1.13451	PMA
FERMT3	Fermitin family homolog 3	Q86UX7	3	3	0.697225	0.396549	1.10032	PMA
FLOT1	Flotillin-1	O75955	1	1	0.020374	0.0269016	10.3604	PMA
GCA	Grancalcin	P28676	3	3	0.211593	0.159932	2.7517	PMA
GLIPR2	Golgi-associated plant pathogenesis-related protein 1	Q9H4G4	1	1	0.279453	0.191212	2.35513	PMA
GLRX	Glutaredoxin-1	P35754	2	2	0.847043	0.450534	1.06843	PMA
GNB1	Guanine nucleotide-binding protein G(I)/G(S)/G(T) subunit beta-1	P62873; Q9HAV0; P16520	4	1	0.357007	0.233426	1.25232	PMA
GNB2	Guanine nucleotide-binding protein G(I)/G(S)/G(T) subunit beta-2	P62879	4	1	0.369915	0.236105	1.32827	PMA
HDC	Histidine decarboxylase	P19113	1	1	0.263731	0.185508	1.70902	PMA
HIST1H2AB	Histone H2A type 1-B/E	P04908	4	1	0.527206	0.318788	1.32751	PMA
HIST1H3A	Histone H3.1	P68431; P84243; Q6NXT2	9	1	0.0239527	0.0294845	9.73929	PMA
HIST1H4A	Histone H4	P62805	10	10	0.706228	0.399907	1.13434	PMA
HIST2H2AB	Histone H2A type 2-B	Q8IUE6	3	1	0.0175849	0.0246378	2.30902	PMA
HIST2H3A	Histone H3.2	Q71DI3	9	1	0.21817	0.162059	1.78032	PMA
HVCN1	Voltage-gated hydrogen channel 1	Q96D96	1	1	0.0954348	0.0847758	35.235	PMA
IQGAP1	Ras GTPase-activating-like protein IQGAP1	P46940	11	11	0.734769	0.405848	1.1987	PMA
ITGAM	Integrin alpha-M	P11215; P20702; Q13349	27	27	0.108196	0.0941705	2.17034	PMA
ITGB2	Integrin beta-2	P05107	23	23	0.0198681	0.0269016	3.65338	PMA
LBR	Lamin-B receptor	Q14739	2	2	0.00171438	0.00678625	10.2588	PMA
LIG4	DNA ligase 4	P49917	1	1	0.011651	0.0186795	12.8164	PMA
LTF	Lactotransferrin	P02788	58	57	0.0649761	0.0625558	1.42643	PMA
LYPLA1	Acyl-protein thioesterase 1	O75608	1	1	0.0710005	0.0676005	29.5438	PMA
MNDA	Myeloid cell nuclear differentiation antigen	P41218	18	18	0.0132201	0.0205248	2.73208	PMA
MPO	Myeloperoxidase	P05164	61	55	0.693072	0.395493	1.07803	PMA
MVP	Major vault protein	Q14764	10	10	0.000408086	0.00503686	2.72066	PMA
NAPRT	Nicotinate phosphoribosyltransferase	Q6XQN6	1	1	0.803435	0.434037	1.22877	PMA
NME1	Nucleoside diphosphate kinase A	P15531	1	1	0.279607	0.191212	1.75503	PMA
PADI2	Protein-arginine deiminase type-2	Q9Y2J8	3	3	0.144778	0.11881	2.63065	PMA
PGM2	Phosphoglucomutase-2	Q96G03	2	2	0.808652	0.43549	1.01169	PMA
PRSS57	Serine protease 57	Q6UWY2	1	1	0.143849	0.118612	1.99927	PMA
PTPRC	Receptor-type tyrosine-protein phosphatase C	P08575	4	4	0.993391	0.496213	1.00839	PMA
RAB10	Ras-related protein Rab-10	P61026	2	1	0.0775314	0.0714502	17.7755	PMA
RAB1B	Ras-related protein Rab-1B	Q9H0U4	2	1	0.309049	0.206431	1.25916	PMA
RAB5A	Ras-related protein Rab-5A	P20339	1	1	0.11301	0.0973766	1.6075	PMA
RAB7A	Ras-related protein Rab-7a	P51149	5	5	0.597991	0.354135	1.53935	PMA
RAP1B	Ras-related protein Rap-1b	P61224; A6NIZ1	5	5	0.020275	0.0269016	2.23992	PMA
RHOA	Transforming protein RhoA	P61586; P08134; P62745	6	6	0.688383	0.394122	1.04761	PMA
RHOG	Rho-related GTP-binding protein RhoG	P84095	2	1	0.128065	0.109256	1.68852	PMA
RNASE3	Eosinophil cationic protein	P12724	7	7	0.676834	0.391411	1.0843	PMA
RPN1	Dolichyl-diphosphooligosaccharide--protein glycosyltransferase subunit 1	P04843	1	1	0.231861	0.170469	4.95282	PMA
RPN2	Dolichyl-diphosphooligosaccharide--protein glycosyltransferase subunit 2	P04844	1	1	5.9e-06	0.00101611	Infinity	PMA
RTN1	Reticulon-1	Q16799	1	1	0.0257138	0.0312065	1.85706	PMA
RTN4	Reticulon-4	Q9NQC3	1	1	0.00227729	0.00769513	15.5625	PMA
S100A12	Protein S100-A12	P80511	3	3	0.792613	0.430892	1.20656	PMA
S100A9	Protein S100-A9	P06702	16	16	0.608581	0.357946	1.20608	PMA
SLC2A14	Solute carrier family 2, facilitated glucose transporter member 14	Q8TDB8	2	2	0.0724682	0.0682439	2.59338	PMA
SLC35A5	Probable UDP-sugar transporter protein SLC35A5	Q9BS91	1	1	0.0515364	0.0522435	2.84227	PMA
SRP14	Signal recognition particle 14 kDa protein	P37108	2	2	0.0700033	0.0670213	4.02499	PMA
SRP9	Signal recognition particle 9 kDa protein	P49458	1	1	0.195674	0.148838	1.55711	PMA
STOM	Erythrocyte band 7 integral membrane protein	P27105; Q8TAV4	6	6	0.079031	0.0724447	2.48987	PMA
SYNGR2	Synaptogyrin-2	O43760	1	1	0.255843	0.182946	1.64703	PMA
TCP1	T-complex protein 1 subunit alpha	P17987	2	2	0.733456	0.405848	1.06024	PMA
TOR1AIP1	Torsin-1A-interacting protein 1	Q5JTV8	1	1	0.0617646	0.0604187	2.82792	PMA
TSPO	Translocator protein	P30536	1	1	0.0360054	0.0406235	2.43502	PMA
UBA1	Ubiquitin-like modifier-activating enzyme 1	P22314	5	5	0.852224	0.451895	1.11765	PMA
UGP2	UTP--glucose-1-phosphate uridylyltransferase	Q16851	6	6	0.0439717	0.0476588	1.29775	PMA
VAT1	Synaptic vesicle membrane protein VAT-1 homolog	Q99536	8	8	0.163301	0.129687	1.31846	PMA
VCP	Transitional endoplasmic reticulum ATPase	P55072	4	4	0.00605802	0.0125782	3.10463	PMA
VNN2	Vascular non-inflammatory molecule 2	O95498	1	1	0.936997	0.483458	1.08483	PMA
XRCC5	X-ray repair cross-complementing protein 5	P13010	2	2	0.13078	0.110478	1.93674	PMA
