# Supplementary material for: Caught in a Trap? Proteomic Analysis of Neutrophil Extracellular Traps in Rheumatoid Arthritis and Systemic Lupus Erythematosus
Source: Front Immunol. 2019 Mar 11;10:423. doi: 10.3389/fimmu.2019.00423 (PMC6421309; doi:10.3389/fimmu.2019.00423)
Supplement: Supplementary file 6 [file Table_6.XLSX]

## Sheet: Citrullination
Supplementary Table 6A - Peptides in healthy control samples identified by PEAKS as having a citrulline modification (designated +.98). Number of samples containing the modification are shown (n=). C(+57.02) carbamidomethylation of cysteine was selected as fixed modification, and M(+15.99) oxidation of methionine was selected as a variable modification.
Protein Accession	Protein name	Peptide	A23187 (n=)	PMA (n=)
P20160|CAP7 (AZU1)	Azurocidin	R.R(+.98)GGIC(+57.02)NGDGGTPLVC(+57.02)EGLAHGVASFSLGPC(+57.02)GR.G	0	3
P08311|CATG	Cathepsin G	R.AQEGLR(+.98)PGTLC(+57.02)TVAGWGR.V	1	2
P31146|COR1A	Coronin-1A	R.R(+.98)AAPEASGTPSSDAVSR.L	1	0
P31146|COR1A	Coronin-1A	R.VNR(+.98)GLDTGR.R	0	1
P14136|GFAP	Glial fibrilary acidic protein	K.TVEMR(+.98)DGEVIK.E	3	1
P19113|DCHS	Histidine decarboxylase	R.DDILR(+.98)DWNLIR.D	1	3
P16402|H13	Histone H1.3	K.ER(+.98)SGVSLAALK.K	3	0
P10412|H14	Histone H1.4
P16401|H15	Histone H1.5
Q16695|H31T	Histone H3.1t	K.VAR(+.98)KSAPATGGVK.K	2	1
P02788|TRFL	Lactotransferrin	K.FGR(+.98)NGSDC(+57.02)PDKFC(+57.02)LFQSETK.N	0	2
P02788|TRFL	Lactotransferrin	K.NLLFNDNTEC(+57.02)LAR(+.98).L	0	1
P41218|MNDA	Myeloid cell nuclear differentiation antigen	R.R(+.98)NVPQNDPVTVVVLK.A	0	3
P05164|PERM	Myeloperoxidase	K.R(+.98)NGFPVALAR.A	0	1
P08246|ELNE	Neutrophil elastase	R.R(+.98)LGNGVQC(+57.02)LAMGWGLLGR.N	0	3
Q7RTY7|OVCH1	Ovochymase-1	K.IITHPEYNSR(+.98)EYMSPDIALLYLK.H	0	1
Q92576|PHF3	PHD finger protein 3	R.LSHGDR(+.98)GTDGK.A	0	1
P63000|RAC1	Ras-related C3 botulinum toxin substrate 1	K.R(+.98)KC(+57.02)LLL	0	1
Q92930|RAB8B	Ras-related protein Rab-8B	K.KTSFFR(+.98)C(+57.02)SLL	0	1
P26447|S10A4	S100A4	K.R(+.98)TDEAAFQK.L	2	0
Supplementary Table 6B - Peptides in over half the RA and SLE samples identified by PEAKS as having a citrulline modification (designated +.98). Number of samples containing the modification are shown (n=). C(+57.02) carbamidomethylation of cysteine was selected as fixed modification, and M(+15.99) oxidation of methionine was selected as a variable modification.
Protein Accession	Protein name	Peptide	SLE A23187	RA A23187	SLE PMA	RA PMA	TOTAL
			(n=)	(n=)	(n=)	(n=)
P68133|ACTS	Actin, alpha skeletal muscle	K.R(+.98)GILTLK.Y	6	6	3	4	19
P68032|ACTC	Actin, cardiac muscle 1 Actin, cytoplasmic 1
P60709|ACTB	Actin, cytoplasmic 2
P63261|ACTG	POTE ankyrin domain family member E
Q6S8J3|POTEE
P31146|COR1A	Coronin-1A	R.R(+.98)AAPEASGTPSSDAVSR.L	6	6	4	5	21
P31146|COR1A	Coronin-1A	R.R(+.98)R(+.98)AAPEASGTPSSDAVSR.L	4	3	2	3	12
P26583|HMGB2	High mobility group protein B2	K.DIAAYR(+.98)AK.G	5	6	1	2	14
P26583|HMGB2	High mobility group protein B2	K.SDKAR(+.98)YDR(+.98)EM(+15.99)K.N	3	5	1	2	11
P16402|H13	Histone H1.3	K.ER(+.98)SGVSLAALK.K	6	5	3	1	13
P10412|H14	Histone H1.4
P16401|H15	Histone H1.5
Q16695|H31T	Histone H3.1t	K.VAR(+.98)KSAPATGGVK.K	6	6	6	5	23
P02788|TRFL	Lactotransferrin	K.FGR(+.98)NGSDC(+57.02)PDKFC(+57.02)LFQSETK.N	2	1	4	5	12
Q14739|LBR	Lamin-B receptor	R.R(+.98)SASASHQADIK.E	3	3	3	5	14
Q14739|LBR	Lamin-B receptor	K.SAR(+.98)R(+.98)SASASHQADIK.E	6	5	0	1	12
P33241|LSP1	Lymphocyte-specific protein 1	K.SR(+.98)WETGEVQAQSAAK.T	6	5	1	1	13
P41218|MNDA	Myeloid cell nuclear differentiation antigen	R.R(+.98)NVPQNDPVTVVVLK.A	4	4	6	5	19
P41218|MNDA	Myeloid cell nuclear differentiation antigen	K.INQEEVGLAAPAPTAR(+.98)NK.L	6	6	1	2	15
P41218|MNDA	Myeloid cell nuclear differentiation antigen	K.LTSEAR(+.98)GR(+.98)IPVAQK.R	6	6	1	2	15
P05204|HMGN2	Non-histone chromosomal protein HMG-17	K.VKDEPQR(+.98)R(+.98)SAR.L	4	4	3	4	15
P08670|VIME	Vimentin	K.TVETR(+.98)DGQVINETSQHHDDLE	6	6	1	3	16
P08670|VIME	Vimentin	K.SR(+.98)LGDLYEEEMR.E	6	5	2	1	14
P08670|VIME	Vimentin	K.NTR(+.98)TNEKVELQELNDR.F	3	4	2	3	12
Supplementary Table 6C - Peptides in over half the A23187-induced samples but less than half the PMA-induced samples identified by PEAKS as having a citrulline modification (designated +.98). Number of samples containing the modification are shown (n=). C(+57.02) carbamidomethylation of cysteine was selected as fixed modification, and M(+15.99) oxidation of methionine was selected as a variable m…
Protein Accession	Protein name	Peptide	SLE A23187	RA A23187	SLE PMA	RA PMA
			(n=)	(n=)	(n=)	(n=)
P68133|ACTS	Actin, alpha skeletal muscle	K.R(+.98)GILTLK.Y	6	6	2	2
P62736|ACTA	Actin, aortic smooth muscle
P63267|ACTH	Actin, gamma-enteric smooth muscle
P0CG39|POTEJ	POTE ankyrin domain family member J
P53999|TCP4	Activated RNA polymerase II transcriptional coactivator p15	K.TGETSR(+.98)ALSSSK.Q	4	4	2	0
P09429|HMGB1	High mobility group protein B1	K.DIAAYR(+.98)AK.G	5	6	1	2
P26583|HMGB2	High mobility group protein B2
P23497|SP100	Nuclear autoantigen Sp-100
P26583|HMGB2	High mobility group protein B2	K.SDKAR(+.98)YDR(+.98)EM(+15.99)K.N	3	5	1	2
P16402|H13	Histone H1.3	K.ER(+.98)SGVSLAALK.K	6	5	3	1
P10412|H14	Histone H1.4
P16401|H15	Histone H1.5
Q14739|LBR	Lamin-B receptor	K.SAR(+.98)R(+.98)SASASHQADIK.E	6	5	0	1
P33241|LSP1	Lymphocyte-specific protein 1	K.SR(+.98)WETGEVQAQSAAK.T	6	5	1	1
P33241|LSP1	Lymphocyte-specific protein 1	K.LIDR(+.98)TESLNR(+.98)SIEK.S	4	3	0	0
P26038|MOES	Moesin	K.QM(+15.99)ER(+.98)AM(+15.99)LENEK.K	6	2	0	0
P41218|MNDA	Myeloid cell nuclear differentiation antigen	K.INQEEVGLAAPAPTAR(+.98)NK.L	6	6	1	2
P41218|MNDA	Myeloid cell nuclear differentiation antigen	K.LTSEAR(+.98)GR(+.98)IPVAQK.R	6	6	1	2
P41218|MNDA	Myeloid cell nuclear differentiation antigen	K.M(+15.99)QEEYNR(+.98)IK.I	5	2	0	0
P35580|MYH10	Myosin 10	K.VGR(+.98)DYVQK.A	6	3	0	0
Q7Z406|MYH14	Myosin 14
P35579|MYH9	Myosin 9
P35579|MYH9	Myosin 9	R.R(+.98)NAEQYKDQADK.A	6	3	0	0
Q86V81|THOC4	THO complex subunit 4	K.AAVHYDR(+.98)SGR.S	3	3	0	0
P08670|VIME	Vimentin	K.TVETR(+.98)DGQVINETSQHHDDLE	6	6	1	3
P08670|VIME	Vimentin	K.SR(+.98)LGDLYEEEMR.E	6	5	2	1
P08670|VIME	Vimentin	K.FADLSEAANR(+.98)NNDALR(+.98)QAK.Q	6	4	0	0
P08670|VIME	Vimentin	K.SR(+.98)LGDLYEEEM(+15.99)R.E	4	2	0	0
Supplementary Table 6D - Peptides in over half the PMA-induced samples but less than half the A23187-induced samples identified by PEAKS as having a citrulline modification (designated +.98). Number of samples containing the modification are shown (n=). C(+57.02) carbamidomethylation of cysteine was selected as fixed modification, and M(+15.99) oxidation of methionine was selected as a variable m…
Protein Accession	Protein Name	Peptide	SLE A23187	RA A23187	SLE PMA	RA PMA
			(n=)	(n=)	(n=)	(n=)
O15143|ARC1B	Actin related protein 2/3 complex subunit 1B	K.QSSQR(+.98)GLTAR.E			2	3
P60709|ACTB	Actin, cytoplasmic 1	K.DLYANTVLSGGTTM(+15.99)YPGIADR(+.98)M(+15.99)QK.E			2	3
P06396|GELS	Gelsolin	K.GGTSR(+.98)EGGQTAPASTR.L			3	3
P02788|TRFL	Lactotransferrin	K.FGR(+.98)NGSDC(+57.02)PDKFC(+57.02)LFQSETK.N	2	1	4	5
P02788|TRFL	Lactotransferrin	K.SQQSSDPDPNC(+57.02)VDR(+.98)PVEGYLAVAVVR.R	1	0	2	3
P05164|PERM	Myeloperoxidase	R.AVSNEIVR(+.98)FPTDQLTPDQER.S	2	2	5	1
P35579|MYH9	Myosin 9	R.R(+.98)GDLPFVVPR.R	2	1	3	3
Q92576|PHF3	PHD finger protein 3	R.LSHGDR(+.98)GTDGK.A	1	0	6	2
P29401|TKT	Transketolase	R.TSR(+.98)PENAIIYNNNEDFQVGQAK.V	1	1	2	4

## Sheet: Acetylation
Supplementary Table 6E - Peptides in at least 22/23 of the RA and SLE samples identified by PEAKS as having an acetylation modification (designated +42.01). C(+57.02) carbamidomethylation of cysteine was selected as fixed modification, and M(+15.99) oxidation of methionine was selected as a variable modification.
Protein Accession	Protein name	Peptide	PTM
P60709|ACTB	Actin, cytoplasmic 1	M.D(+42.01)DDIAALVVDNGSGMC(+57.02)K.A	Acetylation (N-term); Carbamidomethylation
P60709|ACTB	Actin, cytoplasmic 1	M.D(+42.01)DDIAALVVDNGSGM(+15.99)C(+57.02)K.A	Acetylation (N-term); Oxidation (M); Carbamidomethylation
P63261|ACTG	Actin, cytoplasmic 1	M.E(+42.01)EEIAALVIDNGSGM(+15.99)C(+57.02)K.A	Acetylation (N-term); Oxidation (M); Carbamidomethylation
P04083|ANXA1	Annexin A1	M.A(+42.01)M(+15.99)VSEFLK.Q	Acetylation (N-term); Oxidation (M)
P12429|ANXA3	Annexin A3	M.A(+42.01)SIWVGHR.G	Acetylation (N-term)
P23528|COF1	Cofilin-1	M.A(+42.01)SGVAVSDGVIK.V	Acetylation (N-term)
P47756|CAPZB	F-actin-capping protein subunit beta	M.S(+42.01)DQQLDC(+57.02)ALDLMR.R	Acetylation (N-term); Carbamidomethylation
P07305|H10	Histone H1.0	M.T(+42.01)ENSTSAPAAKPK.R	Acetylation (N-term)
P16403|H12	Histone H1.2	M.S(+42.01)ETAPAAPAAAPPAEK.A	Acetylation (N-term)
P16402|H13	Histone H1.3	M.S(+42.01)ETAPLAPTIPAPAEK.T	Acetylation (N-term)
P16401|H15	Histone H1.5	M.S(+42.01)ETAPAETATPAPVEK.S	Acetylation (N-term)
P25788|PSA3	Proteasome subunit alpha type-3	M.S(+42.01)SIGTGYDLSASTFSPDGR.V	Acetylation (N-term)
P63313|TYB10	Thymosin beta 10	M.A(+42.01)DKPDM(+15.99)GEIASFDK.A	Acetylation (N-term); Oxidation (M)
P62328|TYB4	Thymosin beta 4	M.S(+42.01)DKPDM(+15.99)AEIEK.F	Acetylation (N-term); Oxidation (M)
P62328|TYB4	Thymosin beta 4	M.S(+42.01)DKPDM(+15.99)AEIEKFDK.S	Acetylation (N-term); Oxidation (M)
P62328|TYB4	Thymosin beta 4	M.S(+42.01)DKPDMAEIEKFDK.S	Acetylation (N-term)
P62328|TYB4	Thymosin beta 4	M.S(+42.01)DKPDMAEIEK.F	Acetylation (N-term)
P29401|TKT	Transketolase	M(+15.99)(+42.01)ESYHKPDQQK.L	Oxidation (M); Acetylation (N-term)
Supplementary Table 6F - Peptides in over half the A23187-induced samples but less than half the PMA-induced samples identified by PEAKS as having an acetylation modification (designated +42.01). Number of samples containing the modification are shown (n=). C(+57.02) carbamidomethyl cysteine was selected as fixed modification, and M(+15.99) oxidation of methionine was selected as a variable modif…
Protein Accession	Protein name	Peptide	PTM	PMA	A23187
				(n=)	(n=)
P16885|PLCG2	1-phosphatidylinositol 4,5-bisphosphate phosphodiesterase gamma-2	M.S(+42.01)TTVNVDSLAEYEK.S	Acetylation (N-term)	0	6
P63104|1433Z	14-3-3 protein zeta/delta	M(+42.01)DKNELVQK.A	Acetylation (N-term)	0	11
P46976|GLYG	Glycogenin-1	M.T(+42.01)DQAFVTLTTNDAYAK.G	Acetylation (N-term)	5	8
P62826|RAN	GTP-binding nuclear protein Ran	M.A(+42.01)AQGEPQVQFK.L	Acetylation (N-term)	1	6
Q5SSJ5|HP1B3	Heterochromatin protein 1-binding protein 3	M.A(+42.01)TDTSQGELVHPK.A	Acetylation (N-term)	0	6
P16401|H15	Histone H1.5	M.S(+42.01)ET(+79.97)APAETATPAPVEK.S	Acetylation (N-term); Phosphorylation (STY)	0	9
Q92522|H1X	Histone H1x	M.S(+42.01)VELEEALPVTTAEGM(+15.99)AK.K	Acetylation (N-term); Oxidation (M)	0	7
P57053|H2BFS	Histone H2B type F-S	M.PEPAK(+42.01)SAPAPK.K	Acetylation (K)	0	6
P68431|H31 Q16695|H31T Q71DI3|H32	Histone H3.1	K.QTAR(+.98)K(+28.03)STGGK(+42.01)APR(+.98).K	Citrullination; Dimethylation(KR); Acetylation (K)	0	8
P84243|H33	Histone H3.1t
	Histone H3.2
	Histone H3.3
P68431|H31	Histone H3.1t	R.K(+42.01)STGGK(+42.01)APR.K	Acetylation (N-term); Acetylation (K)	4	11
Q16695|H31T Q71DI3|H32	Histone H3.1t
P84243|H33	Histone H3.2
	Histone H3.3
P68431|H31	Histone H3.1	K.APR(+.98)K(+42.01)QLATK.A	Citrullination; Acetylation (K)	0	12
Q71DI3|H32	Histone H3.2
P84243|H33	Histone H3.3
Q16695|H31T	Histone H3.1t	K.APR(+.98)K(+42.01)QLATK.V	Citrullination; Acetylation (K)	0	10
P68431|H31	Histone H3.1	K.QLATK(+42.01)AAR(+.98)K.S	Acetylation (K); Citrullination	0	9
Q71DI3|H32	Histone H3.2
P84243|H33	Histone H3.3
P68431|H31	Histone H3.1	K.QLATK(+42.01)AAR.K	Acetylation (K)	0	9
Q71DI3|H32	Histone H3.2
P84243|H33	Histone H3.3
Q71DI3|H32	Histone H3.2	K.STGGK(+42.01)APR(+.98)K(+42.01)QLATK.A	Acetylation (K); Citrullination	0	6
P62805|H4	Histone H4	M.S(+42.01)GR(+.98)GK(+42.01)GGK(+42.01)GLGK.G	Acetylation (N-term); Citrullination; Acetylation (K)	2	9
P58546|MTPN	Myotrophin	M.C(+57.02)(+42.01)DKEFM(+15.99)WALK.N	Carbamidomethylation; Acetylation (N-term); Oxidation (M)	0	9
Q9Y285|SYFA	Phenylalanine--tRNA ligase alpha subunit	M.A(+42.01)DGQVAELLLR.R	Acetylation (N-term)	4	11
P13796|PLSL	Plastin-2	M.A(+42.01)R(+.98)GSVSDEEMM(+15.99)ELR.E	Acetylation (N-term); Citrullination; Oxidation (M)	2	10
P13796|PLSL	Plastin-2	M.A(+42.01)R(+.98)GSVSDEEM(+15.99)M(+15.99)ELR.E	Acetylation (N-term); Citrullination; Oxidation (M)	4	6
Q9UKY7|CDV3	Protein CDV3 homolog	M.A(+42.01)ETEER(+.98)SLDNFFAK.R	Acetylation (N-term); Citrullination	0	11
Q13045|FLII	Protein flightless-1 homolog	M(+15.99)(+42.01)EATGVLPFVR.G	Oxidation (M); Acetylation (N-term)	4	9
P06454|PTMA	Prothymosin alpha	M.S(+42.01)DAAVDTSSEITTK.D	Acetylation (N-term)	0	7
P51159|RB27A	Ras-related protein Rab-27A	M.S(+42.01)DGDYDYLIK.F	Acetylation (N-term)	5	10
P52566|GDIR2	Rho GDP-dissociation inhibitor 2	M.T(+42.01)EKAPEPHVEEDDDDELDSK.L	Acetylation (N-term)	3	12
Q8NFU3|TSTD1	Thiosulfate:glutathione sulfurtransferase	M.A(+42.01)GAPTVSLPELR.S	Acetylation (N-term)	0	6
F8WBR5|F8WBR5	Calmodulin-2	M.A(+42.01)DQLTEEQIAEFK.E	Acetylation (N-term)	5	12
P37837|TALDO	Transaldolase	R.M(+42.01)ESALDQLK.Q	Acetylation (N-term)	0	9
P55072|TERA	Transitional endoplasmic reticulum ATPase	M.A(+42.01)SGADSKGDDLSTAILK.Q	Acetylation (N-term)	5	7
P29401|TKT	Transketolase	M(+42.01)ESYHKPDQQK.L	Acetylation (N-term)	2	10
O95670|VATG2	V-type proton ATPase subunit G 2	M.A(+42.01)SQSQGIQQLLQAEK.R	Acetylation (N-term)	3	8
Supplementary Table 6G - Peptides in over half the PMA-induced samples but less than half the A23187-induced samples identified by PEAKS as having an acetylation modification (designated +42.01). Number of samples containing the modification are shown (n=). C(+57.02) carbamidomethylation of cysteine was selected as fixed modification, and M(+15.99) oxidation of methionine was selected as a variab…
Protein Accession	Protein name	Peptide	PTM	PMA	A23187
				(n=)	(n=)
O15143|ARC1B	Actin-related protein 2/3 complex subunit 1B	M.A(+42.01)YHSFLVEPISC(+57.02)HAWNK.D	Acetylation (N-term); Carbamidomethylation	8	4
P59998|ARPC4	Actin-related protein 2/3 complex subunit 4	M.T(+42.01)ATLRPYLSAVR.A	Acetylation (N-term)	8	5
P04040|CATA	Catalase	M.A(+42.01)DSRDPASDQMQHWK.E	Acetylation (N-term)	8	4
Q05315|LEG10	Galectin-10	M.S(+42.01)LLPVPYTEAASLSTGSTVTIK.G	Acetylation (N-term)	9	5
P62873|GBB1	Guanine nucleotide-binding protein G(I)/G(S)/G(T) subunit beta-1	M.S(+42.01)ELDQLRQEAEQLK.N	Acetylation (N-term)	11	2
P62879|GBB2	Guanine nucleotide-binding protein G(I)/G(S)/G(T) subunit beta-2
Q9HAV0|GBB4	Guanine nucleotide-binding protein subunit beta-4
P00338|LDHA	L-lactate dehydrogenase A chain	M.A(+42.01)TLKDQLIYNLLK.E	Acetylation (N-term)	9	3
P60660|MYL6	Myosin light polypeptide 6	M.C(+57.02)(+42.01)DFTEDQTAEFKEAFQLFDR.T	Carbamidomethylation; Acetylation (N-term)	9	2
P43490|NAMPT	Nicotinamide phosphoribosyltransferase	M(+15.99)(+42.01)NPAAEAEFNILLATDSYK.V	Oxidation (M); Acetylation (N-term)	11	5
P07737|PROF1	Profilin-1	M.A(+42.01)GWNAYIDNLMADGTC(+57.02)QDAAIVGYK.D	Acetylation (N-term); Carbamidomethylation	9	3
P49721|PSB2	Proteasome subunit beta type-2	M(+15.99)(+42.01)EYLIGIQGPDYVLVASDR.V	Oxidation (M); Acetylation (N-term)	6	1
P0DP24|CALM2	Calmodulin-2	M.A(+42.01)DQLTEEQIAEFKEAFSLFDKDGDGTITTK.E	Acetylation (N-term)	6	0

## Sheet: Methylation
Supplementary Table 6H - Peptides in at least 22/23 of the RA and SLE samples identified by PEAKS as having a methylation or dimethylation modification (designated +14.02 and +28.03 respectively). C(+57.02) carbamidomethylation of cysteine was selected as fixed modification, and M(+15.99) oxidation of methionine was selected as a variable modification.
Protein Accession	Protein name	Peptide	PTM
P63261|ACTG	Actin, cytoplasmic 1	K.YPIEH(+14.02)GIVTNWDDMEK.I	Methylation(others)
P60709|ACTB	Actin, cytoplasmic 2
P63261|ACTG	Actin, cytoplasmic 1	K.YPIEH(+14.02)GIVTNWDDM(+15.99)EK.I	Methylation(others); Oxidation (M)
P60709|ACTB	Actin, cytoplasmic 2
Q71DI3|H32	Histone H3.2	K.AAR(+.98)K(+28.03)SAPATGGVK.K	Citrullination; Dimethylation(KR)
Supplementary Table 6I - Peptides in over half the A23187-induced samples but less than half the PMA-induced samples identified by PEAKS as having methylation or dimethylation modification (designated +14.02 and +28.03 respectively). Number of samples containing the modification are shown (n=). C(+57.02) carbamidomethylation of cysteine was selected as fixed modification, and M(+15.99) oxidation …
Protein Accession	Protein name	Peptide	PTM	SLE PMA	RA PMA	SLE A23187	RA A23187
				(n=)	(n=)	(n=)	(n=)
P11142|HSP7C	Heat shock cognate 71 kDa protein	R.LSKED(+14.02)IER.M	Methylation(others)	1	3	3	5
P68431|H31	Histone H3.1	K.AAR(+.98)K(+28.03)S(+14.02)APATGGVK.K	Citrullination; Dimethylation(KR); Methylation(others)	0	1	3	3
P84243|H33	Histone H3.3	K.AAR(+.98)K(+28.03)SAPSTGGVK.K	Citrullination; Dimethylation (KR)	3	2	5	4
P68431|H31	Histone H3.1	K.QTAR(+.98)K(+28.03)STGGK(+42.01)APR(+.98).K	Citrullination; Dimethylation(KR); Acetylation (K)	0	0	4	3
Q71DI3|H32	Histone H3.2
Q16695|H31T	Histone H3.1t
P84243|H33	Histone H3.3
Q16695|H31T	Histone H3.1t	R.EIAQDFK(+14.02)TDLR.F	Methylation(KR)	0	2	3	6
Q16695|H31T	Histone H3.1t	R.EIAQDFK(+28.03)TDLR.F	Dimethylation(KR)	0	2	3	3
Q16695|H31T	Histone H3.1t	K.VAR(+.98)K(+14.02)SAPATGGVK.K	Citrullination; Methylation(KR)	0	2	3	5
P09493|TPM1	Tropomyosin alpha-1 chain	K.HIAED(+14.02)ADR.K	Methylation(others)	3	1	4	4
P67936|TPM4	Tropomyosin alpha-4 chain	R.K(+14.02)(+14.02)IQALQQQADEAEDR.A	Methylation(KR); Methylation (Protein N-term)	2	2	4	5
Supplementary Table 6J - Peptides in over half the PMA-induced samples but less than half the A23187-induced samples identified by PEAKS as having methylation or dimethylation modification (designated +14.02 and +28.03 respectively). Number of samples containing the modification are shown (n=). C(+57.02) carbamidomethylation of cysteine was selected as fixed modification, and M(+15.99) oxidation …
Protein Accession	Protein name	Peptide	PTM	SLE PMA	RA PMA	SLE A23187	RA A23187
				(n=)	(n=)	(n=)	(n=)
P62736|ACTA	Actin, aortic smooth muscle	K.IWHHS(+14.02)FYNELR.V	Methylation(others)	3	3	3	1
P00450|CERU	Ceruloplasmin	K.MYYSAVD(+14.02)PTK.D	Methylation(others)	5	2	0	0
P05164|PERM	Myeloperoxidase	R.NQINALTSFVDASMVYGS(+14.02)E(+14.02) E(+14.02)PLAR(+.98)(+14.02).N	Methylation(others); Citrullination; Methylation(C-term)	3	3	1	0
Q13813|SPTN1	Spectrin alpha chain, non-erythrocytic 1	K.HED(+14.02)FEK.S	Methylation(others)	3	4	1	2
